# Supplementary material
Source: PubMed Central journal article supplement (PMC3208281)
Supplement: supp_blood-2011-04-346411_Document1.pdf [file supp_blood-2011-04-346411_Document1.pdf]

**Table S1. Characteristics of patients treated with CHOP only**

|                                       | <b>FcγRIIa</b>                            |                                              |                                              |                      |                | <b>FcγRIIIa</b>                              |                                              |                                            |                      |                |
|---------------------------------------|-------------------------------------------|----------------------------------------------|----------------------------------------------|----------------------|----------------|----------------------------------------------|----------------------------------------------|--------------------------------------------|----------------------|----------------|
|                                       | <b>R/R<br/>n=33<br/>(13.3%)</b>           | <b>R/H<br/>n=114<br/>(45.8%)</b>             | <b>H/H<br/>n=102<br/>(41.0%)</b>             | <b>total</b>         | <b>p-value</b> | <b>V/V<br/>n=69<br/>(27.7%)</b>              | <b>V/F<br/>n=131<br/>52.6%</b>               | <b>F/F<br/>n=49<br/>(19.7%)</b>            | <b>total</b>         | <b>p-value</b> |
| <b>Male<br/>Female</b>                | 20 (61%)<br>13 (39%)                      | 64 (56%)<br>50 (44%)                         | 47 (46%)<br>55 (54%)                         | 131<br>118           | 0.212          | 40 (58%)<br>29 (42%)                         | 69 (53%)<br>62 (47%)                         | 22 (45%)<br>27 (55%)                       | 131<br>118           | 0.371          |
| <b>Age, median<br/>[range]</b>        | 67<br>[61-77]                             | 68<br>[61-80]                                | 68<br>[61-79]                                |                      | 0.256          | 68<br>[61-78]                                | 70<br>[61-80]                                | 67<br>[61-79]                              |                      | 0.048          |
| <b>LDH &gt; UNV</b>                   | 13 (39%)                                  | 65 (57%)                                     | 48 (47%)                                     | 126                  | 0.133          | 31 (45%)                                     | 68 (52%)                                     | 27 (55%)                                   | 126                  | 0.510          |
| <b>ECOG &gt; 1</b>                    | 1 (3%)                                    | 18 (16%)                                     | 14 (14%)                                     | 33                   | 0.155          | 6 (9%)                                       | 15 (11%)                                     | 12 (24%)                                   | 33                   | 0.038          |
| <b>Stage III/IV</b>                   | 14 (42%)                                  | 65 (57%)                                     | 51 (50%)                                     | 130                  | 0.288          | 38 (55%)                                     | 65 (50%)                                     | 27 (55%)                                   | 130                  | 0.709          |
| <b>Extranodal<br/>sites &gt;1</b>     | 3 (9%)                                    | 21 (18%)                                     | 12 (12%)                                     | 36                   | 0.290          | 9 (13%)                                      | 19 (15%)                                     | 8 (16%)                                    | 36                   | 0.862          |
| <b>IPI<br/>1<br/>2<br/>3<br/>4, 5</b> | 14 (42%)<br>10 (30%)<br>6 (18%)<br>3 (9%) | 23 (20%)<br>36 (32%)<br>38 (33%)<br>17 (15%) | 35 (34%)<br>26 (25%)<br>26 (25%)<br>15 (15%) | 72<br>72<br>70<br>35 | 0.125          | 21 (30%)<br>23 (33%)<br>15 (22%)<br>10 (14%) | 42 (32%)<br>33 (25%)<br>39 (30%)<br>17 (13%) | 9 (18%)<br>16 (33%)<br>16 (33%)<br>8 (16%) | 72<br>72<br>70<br>35 | 0.446          |
| <b>Bulky disease</b>                  | 9 (27%)                                   | 61 (54%)                                     | 35 (34%)                                     | 105                  | 0.003          | 25 (36%)                                     | 54 (41%)                                     | 26 (53%)                                   | 105                  | 0.181          |
| <b>B symptoms</b>                     | 8 (24%)                                   | 41 (36%)                                     | 39 (38%)                                     | 88                   | 0.348          | 18 (26%)                                     | 47 (36%)                                     | 23 (47%)                                   | 88                   | 0.063          |
| <b>BM<br/>involvement</b>             | 1 (3%)                                    | 2 (2%)                                       | 7 (7%)                                       | 10                   | 0.133          | 2 (3%)                                       | 6 (5%)                                       | 2 (4%)                                     | 10                   | 0.913          |

**Table S2. Characteristics of patients treated with R-CHOP**

**FcγRIIa**

**FcγRIIIa**

|                                   | <b>R/R<br/>n=31<br/>(11.8%)</b> | <b>R/H<br/>n=121<br/>(46.0%)</b> | <b>H/H<br/>n=111<br/>(42.2%)</b> | <b>total</b> | <b>p-value</b> | <b>V/V<br/>n=76<br/>(28.9%)</b> | <b>V/F<br/>n=140<br/>(53.2%)</b> | <b>F/F<br/>n=47<br/>(18.9%)</b> | <b>total</b> | <b>p-value</b> |
|-----------------------------------|---------------------------------|----------------------------------|----------------------------------|--------------|----------------|---------------------------------|----------------------------------|---------------------------------|--------------|----------------|
| <b>Male</b>                       | 16 (52%)                        | 67 (55%)                         | 58 (52%)                         | 141          | 0.881          | 41 (54%)                        | 70 (50%)                         | 30 (64%)                        | 141          | 0.261          |
| <b>Female</b>                     | 15 (48%)                        | 54 (45%)                         | 53 (48%)                         | 122          |                | 35 (46%)                        | 70 (50%)                         | 17 (36%)                        | 122          |                |
| <b>Age, median<br/>(range)</b>    | 67<br>[61-80]                   | 69<br>[61-80]                    | 68<br>[61-80]                    |              | 0.681          | 69<br>[61-80]                   | 68<br>[61-80]                    | 67<br>[61-78]                   |              | 0.501          |
| <b>LDH &gt; UNV</b>               | 15 (48%)                        | 60 (50%)                         | 49 (44%)                         | 124          | 0.705          | 35 (46%)                        | 69 (49%)                         | 20 (43%)                        | 124          | 0.706          |
| <b>ECOG &gt; 1</b>                | 8 (26%)                         | 14 (12%)                         | 12 (11%)                         | 34           | 0.093          | 10 (13%)                        | 22 (16%)                         | 2 (4%)                          | 34           | 0.114          |
| <b>Stage III/ IV</b>              | 15 (48%)                        | 63 (52%)                         | 50 (45%)                         | 128          | 0.574          | 35 (46%)                        | 72 (51%)                         | 21 (45%)                        | 128          | 0.647          |
| <b>Extranodal<br/>sites &gt;1</b> | 5 (16%)                         | 23 (19%)                         | 20 (18%)                         | 48           | 0.949          | 16 (21%)                        | 28 (20%)                         | 4 (9%)                          | 48           | 0.149          |
| <b>IPI</b>                        |                                 |                                  |                                  |              | 0.587          |                                 |                                  |                                 |              | 0.210          |
| <b>1</b>                          | 8 (26%)                         | 40 (33%)                         | 44 (40%)                         | 92           |                | 27 (36%)                        | 45 (32%)                         | 20 (43%)                        | 92           |                |
| <b>2</b>                          | 11 (35%)                        | 29 (24%)                         | 23 (21%)                         | 63           |                | 21 (28%)                        | 32 (23%)                         | 10 (21%)                        | 63           |                |
| <b>3</b>                          | 6 (19%)                         | 30 (25%)                         | 28 (25%)                         | 64           |                | 13 (17%)                        | 37 (26%)                         | 14 (30%)                        | 64           |                |
| <b>4, 5</b>                       | 6 (19%)                         | 22 (18%)                         | 16 (14%)                         | 44           |                | 15 (20%)                        | 26 (19%)                         | 3 (6%)                          | 44           |                |
| <b>Bulky disease</b>              | 14 (45%)                        | 42 (35%)                         | 45 (41%)                         | 101          | 0.448          | 27 (36%)                        | 57 (41%)                         | 17 (36%)                        | 101          | 0.714          |
| <b>B symptoms</b>                 | 8 (26%)                         | 45 (37%)                         | 31 (28%)                         | 84           | 0.259          | 20 (26%)                        | 47 (34%)                         | 17 (36%)                        | 84           | 0.449          |
| <b>BM<br/>involvement</b>         | 3 (10%)                         | 8 (7%)                           | 7 (6%)                           | 18           | 0.741          | 5 (7%)                          | 10 (7%)                          | 3 (6%)                          | 18           | 1.000          |

**Table S3. Characteristics of patients of the RICOVER-60 with and without DNA**

|                                                                                                               | <b>DNA available<br/>n=512<br/>(42%)</b>         | <b>DNA missing<br/>n=710<br/>(58%)</b>           | <b>RICOVER-60<br/>all<br/>n=1222<br/>(100%)</b>  | <b>p-value</b> |
|---------------------------------------------------------------------------------------------------------------|--------------------------------------------------|--------------------------------------------------|--------------------------------------------------|----------------|
| <b>Male</b><br><b>Female</b>                                                                                  | 272 (53%)<br>240 (47%)                           | 378 (53%)<br>332 (47%)                           | 650 (53%)<br>572 (47%)                           | 1.000          |
| <b>Age, median<br/>[range]</b>                                                                                | 68<br>[61-80]                                    | 68<br>[61-80]                                    | 68<br>[61-80]                                    | 0.830          |
| <b>LDH &gt; UNV</b>                                                                                           | 250 (49%)                                        | 354 (50%)                                        | 604 (49%)                                        | 0.728          |
| <b>ECOG &gt; 1</b>                                                                                            | 67 (13%)                                         | 109 (15%)                                        | 176 (14%)                                        | 0.284          |
| <b>Stage III/IV</b>                                                                                           | 258 (50%)                                        | 361 (51%)                                        | 619 (51%)                                        | 0.908          |
| <b>Extranodal sites &gt;1</b>                                                                                 | 84 (16%)                                         | 132 (19%)                                        | 216 (18%)                                        | 0.362          |
| <b>IPI</b><br><b>1</b><br><b>2</b><br><b>3</b><br><b>4, 5</b>                                                 | 164 (32%)<br>135 (26%)<br>134 (26%)<br>79 (15%)  | 208 (29%)<br>204 (29%)<br>179 (25%)<br>119 (17%) | 372 (30%)<br>339 (28%)<br>313 (26%)<br>198 (16%) | 0.624          |
| <b>Bulky disease</b>                                                                                          | 206 (40%)                                        | 257 (36%)                                        | 463 (38%)                                        | 0.152          |
| <b>B symptoms</b>                                                                                             | 172 (34%)                                        | 227 (32%)                                        | 399 (33%)                                        | 0.578          |
| <b>BM involvement</b>                                                                                         | 28 (5%)                                          | 45 (6%)                                          | 73 (6%)                                          | 0.544          |
| <b>Treatment arm:</b><br><b>6xChop-14</b><br><b>8xChop-14</b><br><b>6xChop-14+8xR</b><br><b>8xChop-14+8xR</b> | 127 (25%)<br>122 (24%)<br>124 (24%)<br>139 (27%) | 180 (25%)<br>183 (26%)<br>182 (26%)<br>165 (23%) | 307 (25%)<br>305 (25%)<br>306 (25%)<br>304 (25%) | 0.469          |

**Table S4. Frequency of genotypes in CHOP and R-CHOP**

|                 |     | <b>CHOP<br/>(n=249)</b> | <b>R-CHOP<br/>(n=263)</b> | <b>all<br/>(n=512)</b> |
|-----------------|-----|-------------------------|---------------------------|------------------------|
| <b>FcγRIIa</b>  | R/R | 33 (13.3%)              | 31 (11.8%)                | 64 (12.5%)             |
|                 | R/H | 114 (45.8%)             | 121 (46.0%)               | 235 (45.9%)            |
|                 | H/H | 102 (41.0%)             | 111 (42.2%)               | 213 (41.6%)            |
| <b>FcγRIIIa</b> | F/F | 49 (19.7%)              | 47 (17.9%)                | 96 (18.8%)             |
|                 | V/F | 131 (52.6%)             | 140 (53.2%)               | 271 (52.9%)            |
|                 | V/V | 69 (27.7%)              | 76 (28.9%)                | 145 (28.3%)            |

FcγRII a      R-CHOP vs. CHOP: Fishers exact test: p-value=0.863  
 FcγRIIIa      R-CHOP vs. CHOP: Fishers exact test: p-value=0.873

**Table S5. Number of events in the various subgroups****a) Event-free survival**

|                 |     | <b>CHOP</b>  | <b>R-CHOP</b> |
|-----------------|-----|--------------|---------------|
| <b>FcγRIIa</b>  | H/H | 52 (50.98%)  | 29(26.13%     |
|                 | R/H | 54 (47.37%)  | 42 (34.71%)   |
|                 | R/R | 19 (57.58%)  | 9 (29.03%)    |
| <b>FcγRIIIa</b> | F/F | 22 (44..90%) | 17 (36.17%)   |
|                 | V/F | 69 (52.67%)  | 42 (30.00%)   |
|                 | V/V | 34 (49.28%)  | 21 (27.63%)   |

**b) Progression-free survival**

|                 |     |             |             |
|-----------------|-----|-------------|-------------|
| <b>FcγRIIa</b>  | H/H | 48 (47.06%) | 23 (20.72%) |
|                 | R/H | 48 (42.11%) | 35 (28.93%) |
|                 | R/R | 16 (48.49%) | 8 (25-81%)  |
| <b>FcγRIIIa</b> | F/F | 20 (40.82%) | 15 (31.92%) |
|                 | V/F | 60 (45.80%) | 33 (24.57%) |
|                 | V/V | 32 (46.38%) | 18 (23.68%) |

**c) Overall survival**

|                 |     |             |             |
|-----------------|-----|-------------|-------------|
| <b>FcγRIIa</b>  | H/H | 38 (37.26%) | 21 (18.92%) |
|                 | R/H | 36 (31.58%) | 34 (28.10%) |
|                 | R/R | 11 (33.33%) | 7 (22.58%)  |
| <b>FcγRIIIa</b> | F/F | 18 (36.74%) | 12 (25.53%) |
|                 | V/F | 41 (31.30%) | 31 (22.14%) |
|                 | V/V | 26 (37.68%) | 18 (25.00%) |
